# Supplementary material for: Circulating angiopoietin-like proteins in metabolic-associated fatty liver disease: a systematic review and meta-analysis
Source: PubMed Central journal article supplement (PMC8152125; doi:10.1186/s12944-021-01481-1), 2021-05-25
Supplement: 12944_2021_1481_MOESM3_ESM.pdf [file 12944_2021_1481_MOESM3_ESM.pdf]

## GRADE summary of findings table.

| Outcome | Participants (studies)  | Risk of bias         | Inconsistency        | Indirectness | Imprecision          | Other considerations               | Overall certainty of evidence |
|---------|-------------------------|----------------------|----------------------|--------------|----------------------|------------------------------------|-------------------------------|
| ANGPTL8 | 9 observational studies | Serious <sup>1</sup> | Serious <sup>2</sup> | Not serious  | Not serious          | Plausible confounding <sup>4</sup> | ⊕○○○<br>VERY LOW              |
| ANGPTL4 | 2 observational studies | Serious <sup>1</sup> | Serious <sup>2</sup> | Not serious  | Serious <sup>3</sup> | Plausible confounding <sup>4</sup> | ⊕○○○<br>VERY LOW              |
| ANGPTL3 | 2 observational studies | Serious <sup>1</sup> | Serious <sup>2</sup> | Not serious  | Serious <sup>3</sup> | Plausible confounding <sup>4</sup> | ⊕○○○<br>VERY LOW              |

<sup>1</sup>Serious risk of bias due to the NOS score (5-6)

<sup>2</sup>Serious inconsistency due to significant heterogeneity ( $I^2 > 40\%$ )

<sup>3</sup>Serious imprecision due to small sample size ( $n < 400$ )

<sup>4</sup>all plausible residual confounding would reduce the demonstrated effect. Some of the studies do not match the basic information of two groups, like age, BMI and so on.
